# Supplementary material
Source: PubMed Central journal article supplement (PMC7228806)
Supplement: NIHMS1586764-supplement-1.pdf [file NIHMS1586764-supplement-1.pdf]

**Supplemental Information**

**Genome-wide Profiling Identifies DNA Methylation**

**Signatures of Aging in Rod Photoreceptors**

**Associated with Alterations in Energy Metabolism**

**Ximena Corso-Díaz, James Gentry, Ryan Rebernick, Catherine Jaeger, Matthew J. Brooks, Freekje van Asten, Keshav Kooragayala, Linn Gieser, Jacob Nellissery, Raul Covian, Tiziana Cogliati, Anupam K. Mondal, Ke Jiang, and Anand Swaroop**

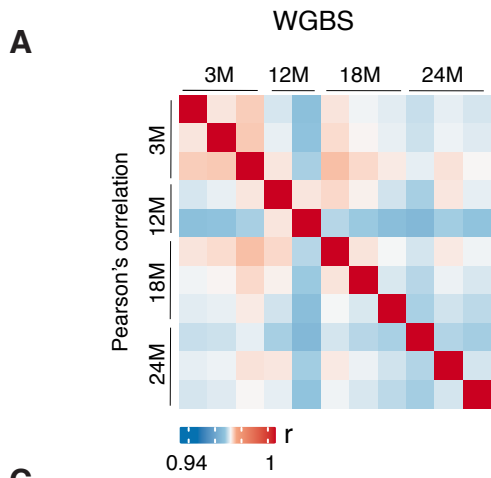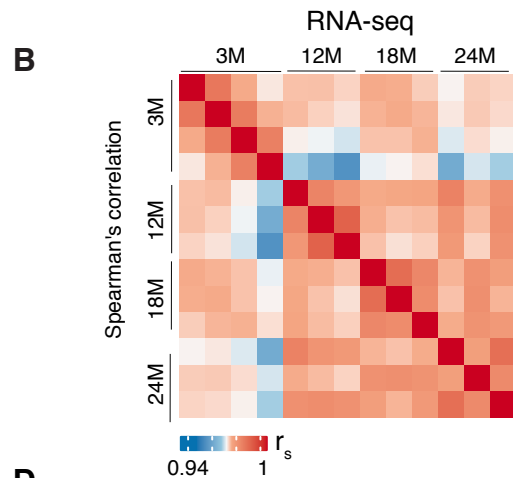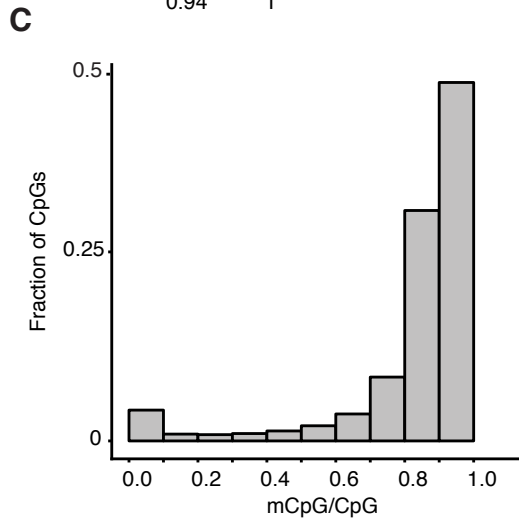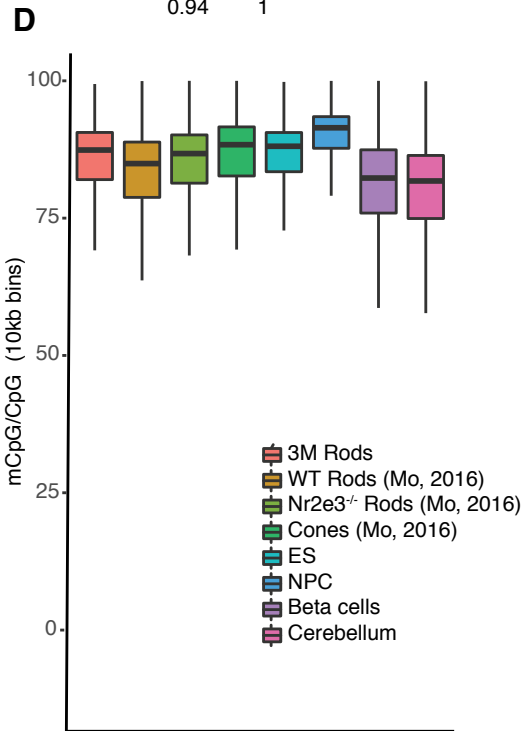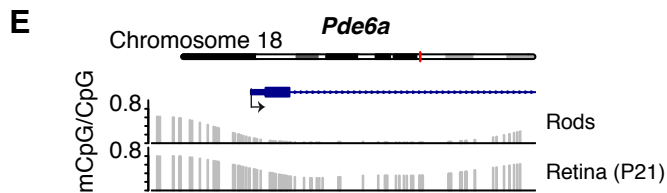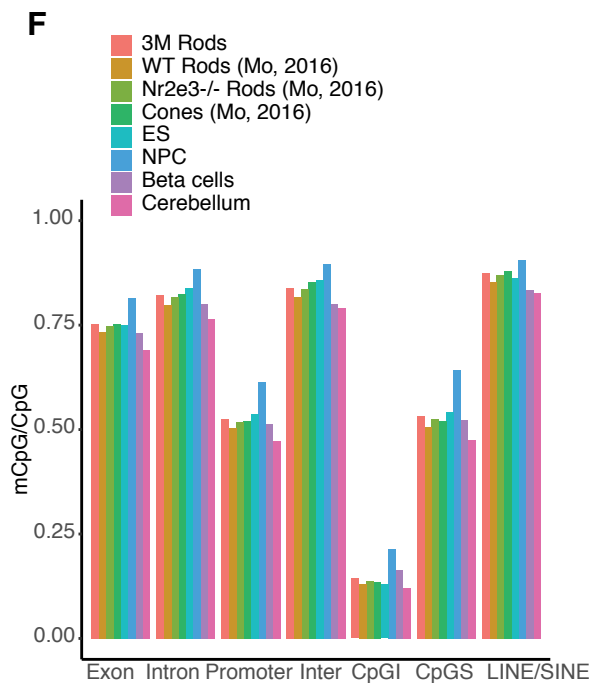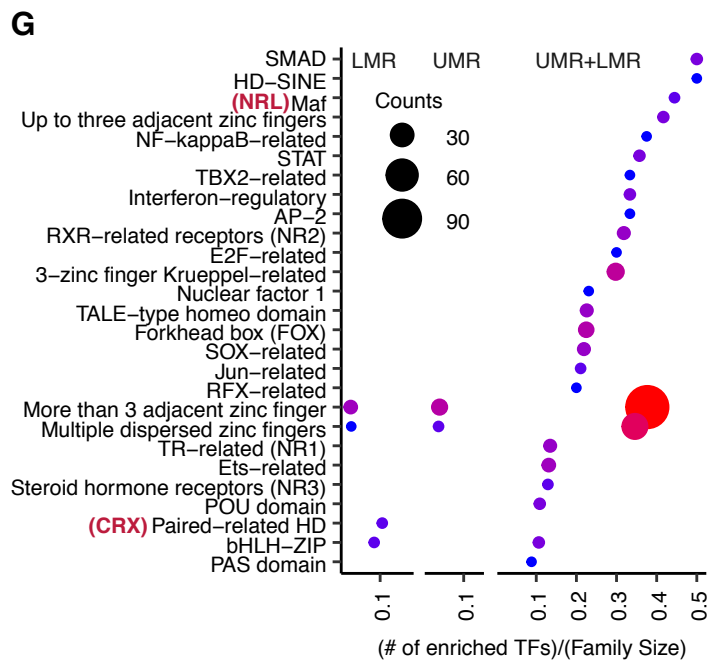

**Figure S1. Characteristics of the rod methylome and transcriptome. Related to figure 1.** Correlation matrix of aging datasets based on A) DNA methylation and B) RNA expression. The heatmap shows the correlation coefficients ( $r$ , Pearson correlation;  $r_s$ , Spearman correlation) between whole-genome bisulfite sequencing (WGBS) or RNA-seq samples (WGBS:  $n = 3$  for 3M, 18M, 24M;  $n = 2$  for 12M; RNA-seq:  $n = 4$  for 3M and  $n = 3$  for 12M, 18M and 24M). C) Fraction of methylated CpGs genome-wide. D) Comparison of CpG methylation levels (mean over 10 kb bins) in different tissues and cell types. WT = wild type; ES = embryonic stem cell; NPC = neural precursor cell. The methylomes of wild-type rods, cones and *Nr2e3*<sup>-/-</sup> rods were obtained from (Mo, et al., 2016), NPC and ES from (Stadler et al., 2011), cerebellum from (Hon et al., 2013) and beta cells from (Avrahami et al., 2015). (E) Comparison of CpG methylation levels at the promoter region of *Pde6a* in purified rods obtained in this study and whole adult retina (P21) from a published dataset (Aldiri et al., 2017). Methylation levels were obtained using the same pipeline (see methods). F) CpG methylation levels at different genomic regions of various tissues and cell types. Inter = intergenic; CpGi = CpG island; CpGs = CpG shore. G) Transcription factor motifs identified in UMRs, LMRs or both regions using TRANSFAC ( $p$ -value < 0.05). Families that had at least 3 enriched transcription factors (TFs) are shown. The number of TF families represented in DMRs (counts) are depicted by the size of the dots (30 = blue, 60 = purple, 90 = red). Paired-related HD family includes CRX. Maf family includes NRL.

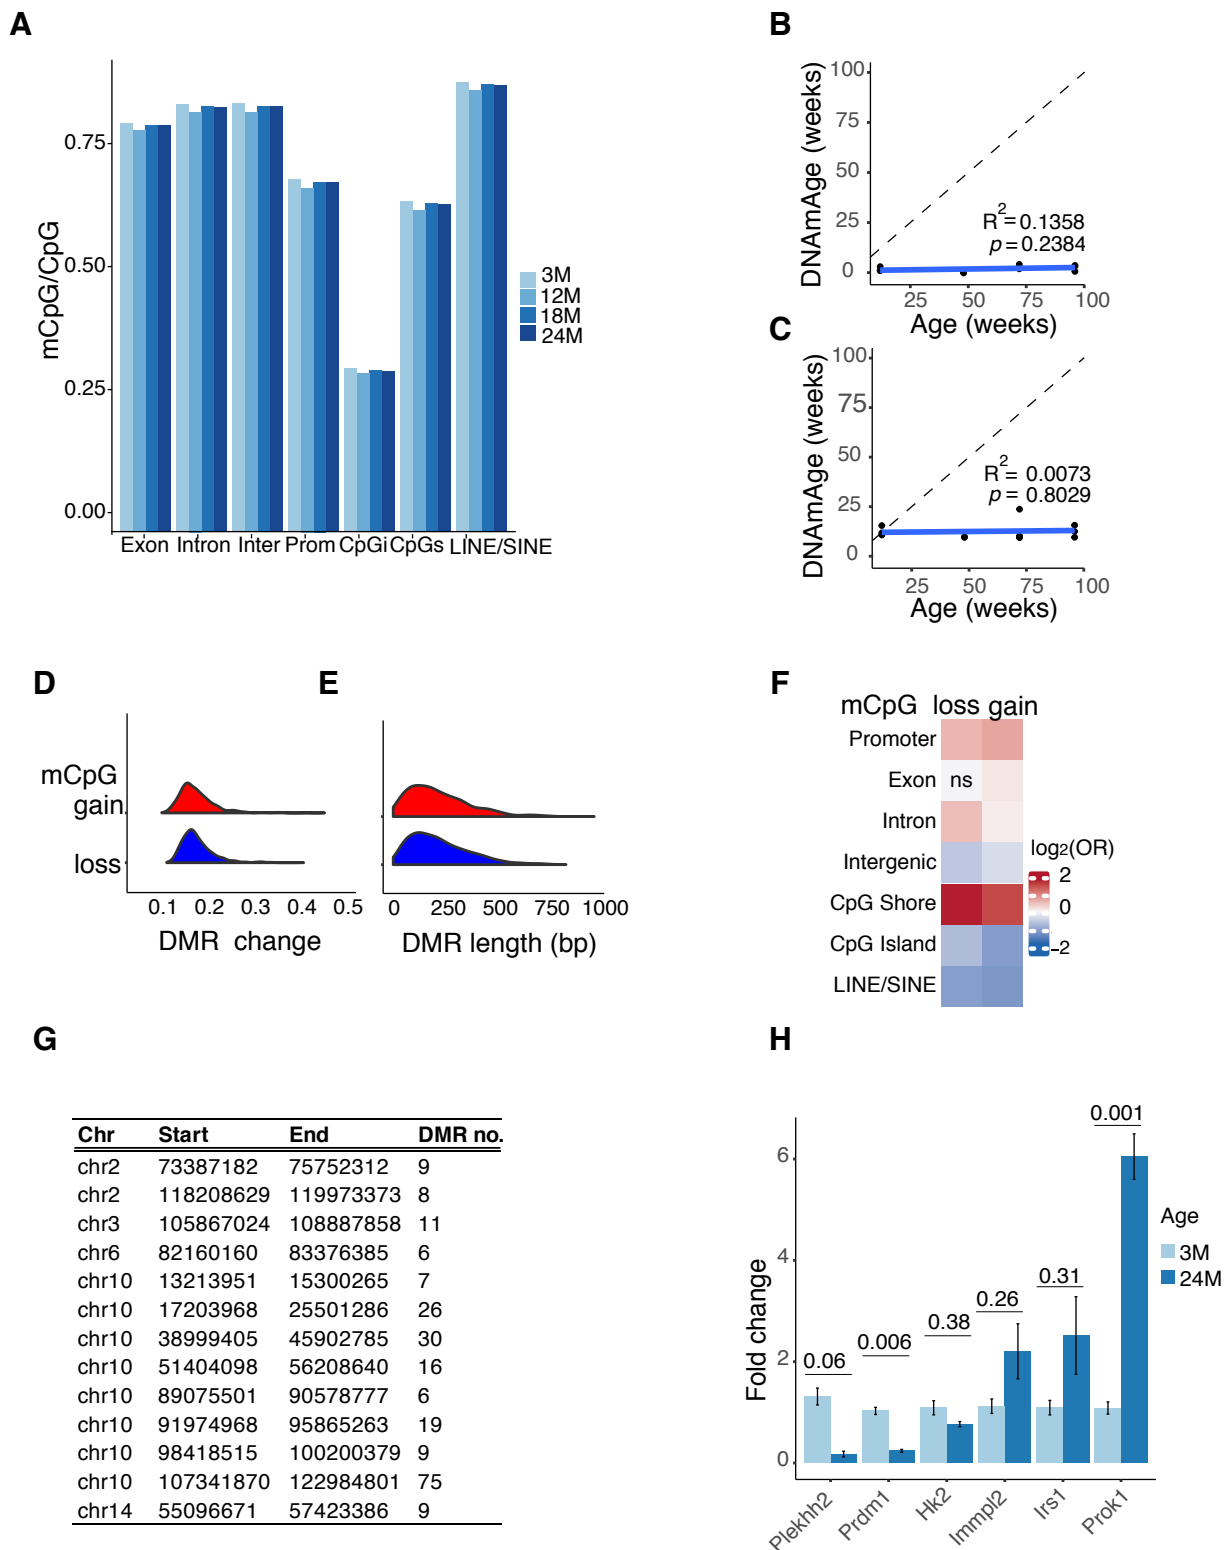

**Figure S2. DNA methylation differences across time-points. Related to figures 2 and 5.** A) Mean CpG methylation in different genomic regions at different time points. Inter = intergenic; prom = promoter; CpGi = CpG island; CpGs = CpG shore. B,C) Correlation between biological and epigenetic age using the B) (Stubbs et al., 2017) and C) (Meer et al., 2018) multi-tissue clocks. D,E) Distribution of DMRs by D) change difference and E) length in base pairs (bp). F) Heatmap showing the odds ratio (OR) of CpG counts within each genomic region. G) Table showing the location of DMR hotspots and DMR number per hotspot in rods. H) Bar graph showing the fold change expression difference by qRT-PCR of genes that harbor differential DNA methylation and expression by RNA-seq. Values were obtained using the delta-delta CT method normalized against *Hnmpd*. DMR = differentially methylated region; n = 4 for 3M; n = 3 for 24M. Error bars, +/- SEM. Fold change means were compared between 3M and 24M using unpaired students t-test. *p* values are shown for each comparison.



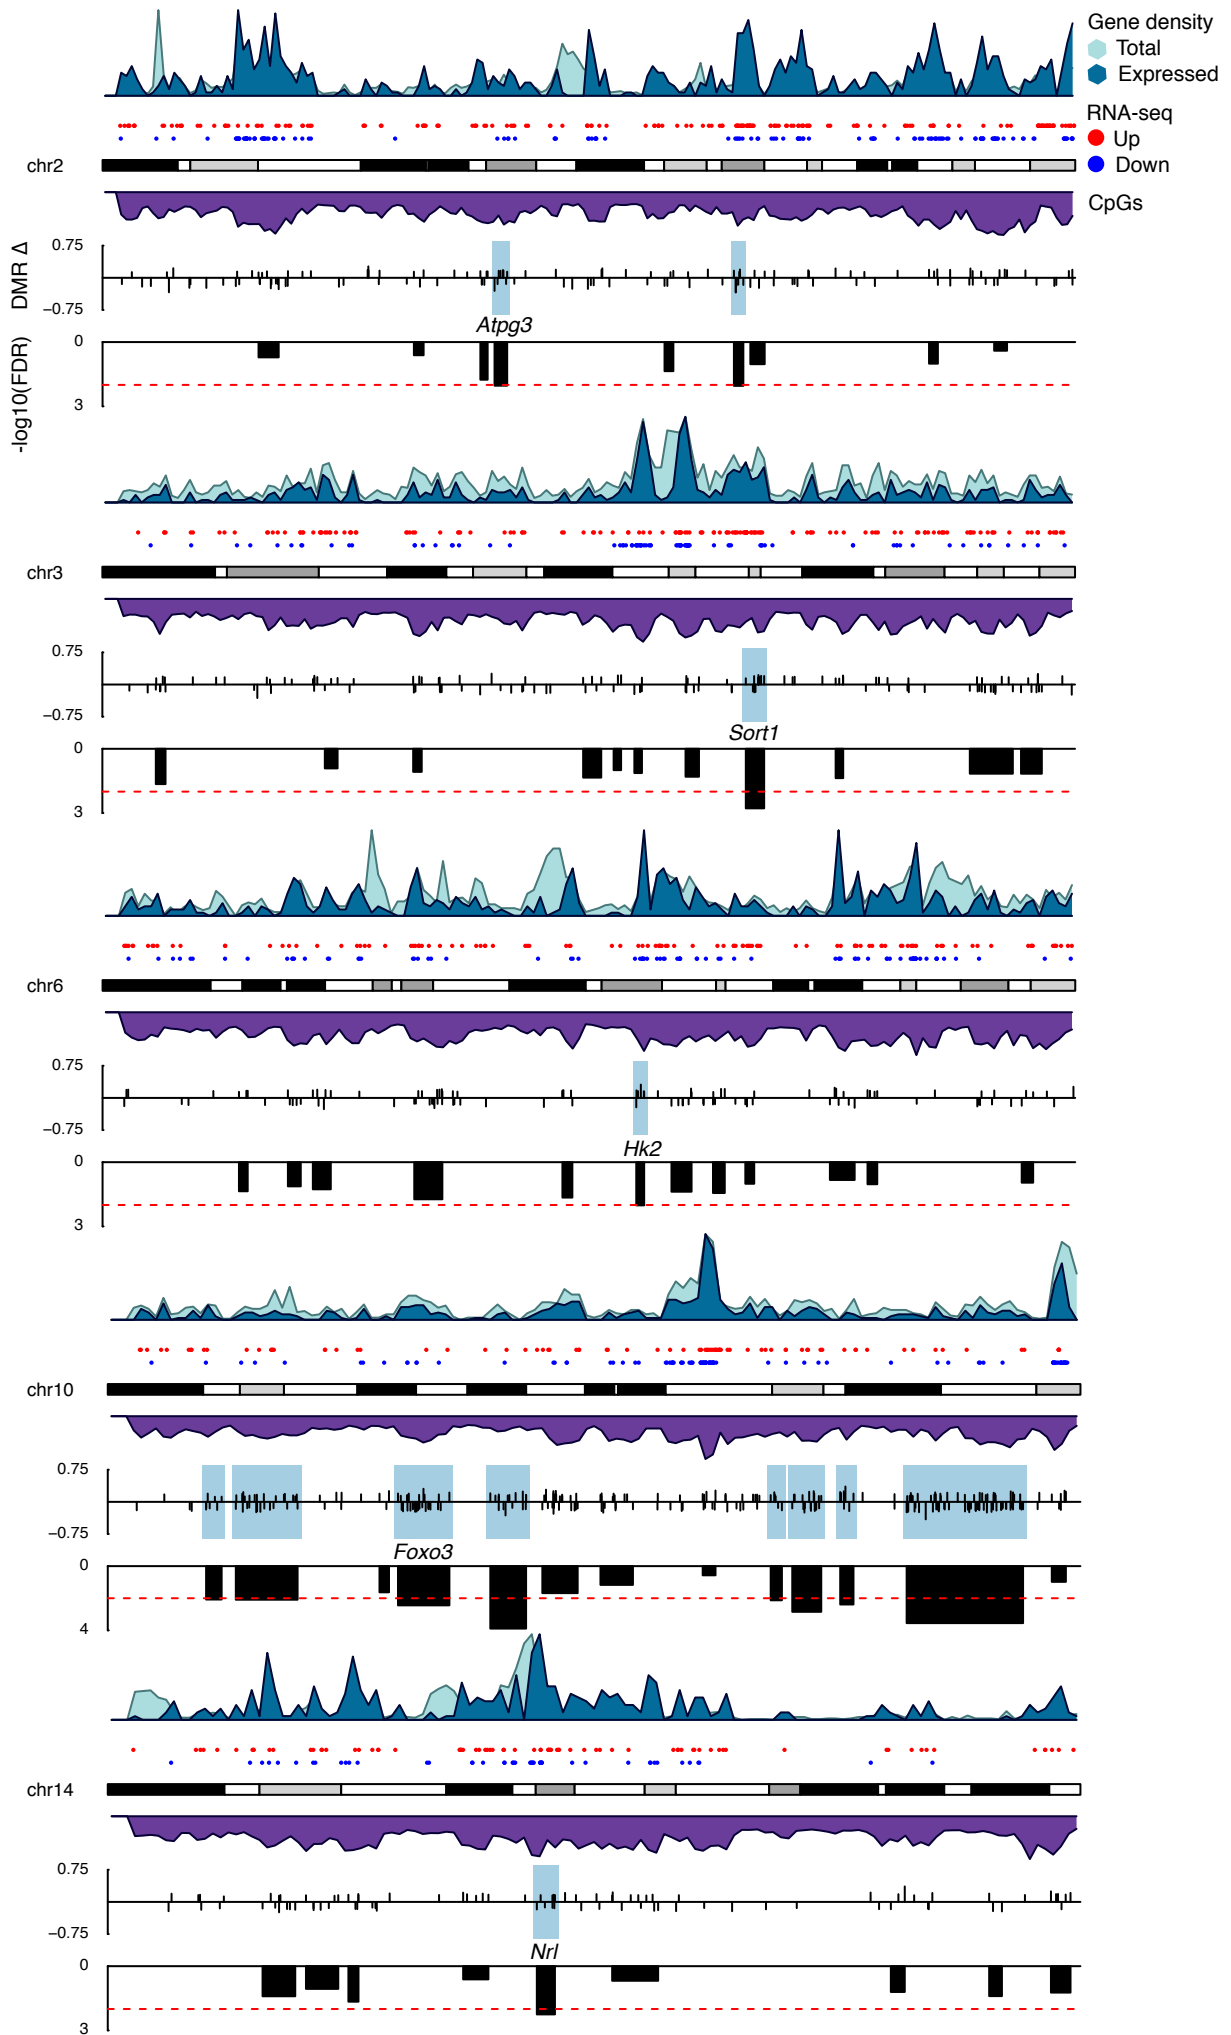

**Figure S3. Chromosomal DMR hotspots. Related to figure 2.** Idiograms showing chromosomes 2, 3, 6, 10 and 14 showing regions of DMR hotspots (blue boxes). DMRs that gain or lose methylation with age are shown as black ticks. DMR density higher than average, determined by a region-growing algorithm (see methods), is displayed in black boxes. Red dotted line indicates the  $p$ -value cutoff ( $FDR \leq 0.01$ ) of the hotspot enrichment after correcting for CpG number and gene density. On top, gene density is shown for all genes (light blue) and expressed genes > 10 CPM (darker blue). Upregulated and downregulated genes are shown in red and blue dots, respectively. CpG density is shown in purple. DMR = differentially methylated region.

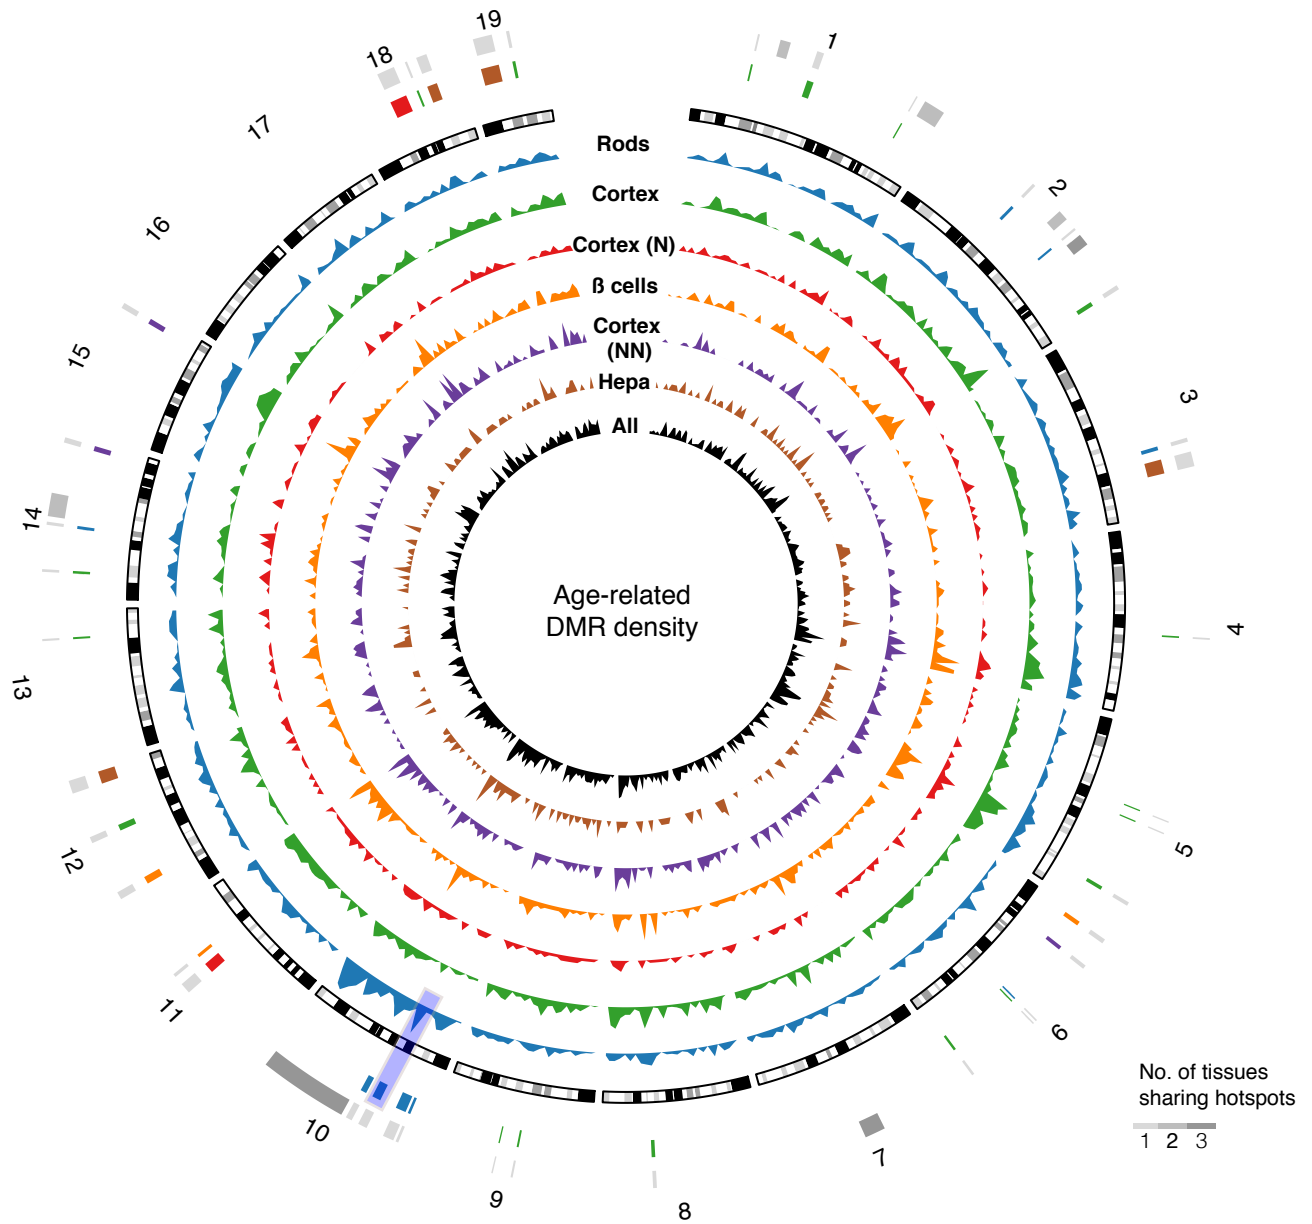

**Figure S4. Distribution of DMR hotspots in various tissues. Related to figure 2.** Circos plot showing DMR (differentially methylated region) hotspots (high age-associated DMR density,  $p$ -value  $\leq 0.01$ ) in rods (blue), whole frontal cortex (green), neuronal frontal cortex (N) (red), non-neuronal frontal cortex (NN) (purple) cells, beta cells (orange) and liver cells (Hepa) (brown). The combined densities are shown in black. The second outermost circle displays the location of unique hotspots for each tissue. Hotspots shared by more than one tissue are shown in the outermost circle. A hotspot located in a region reported to function as a longevity interactome is highlighted with a purple box.

**A**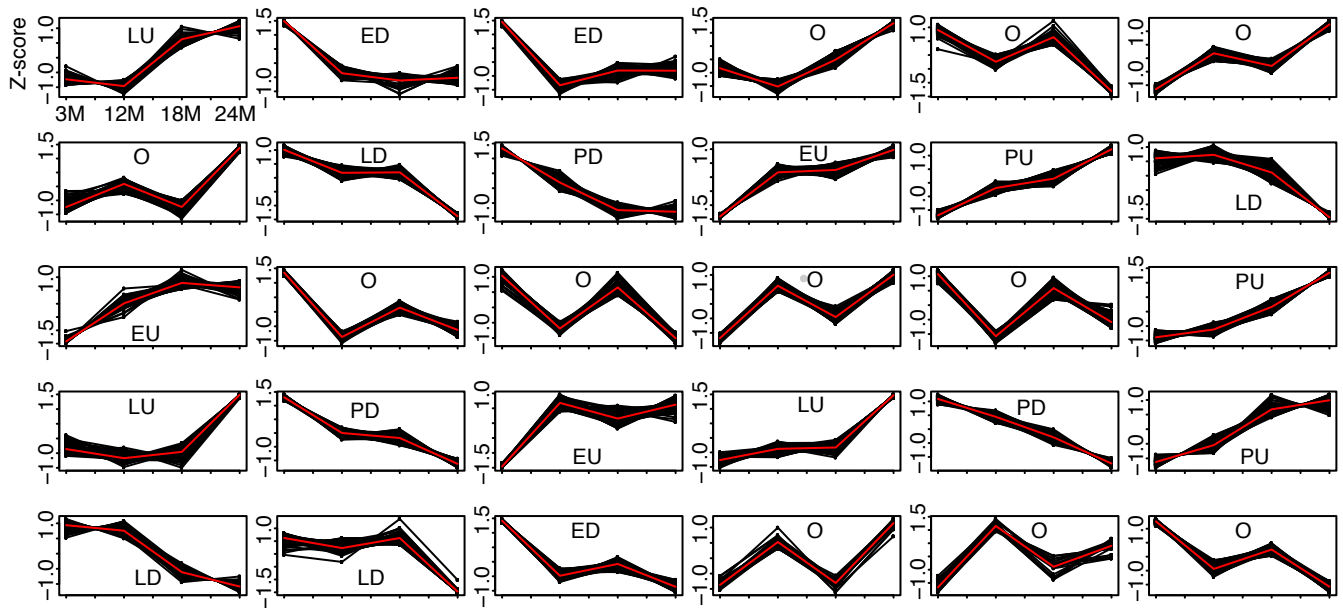**B**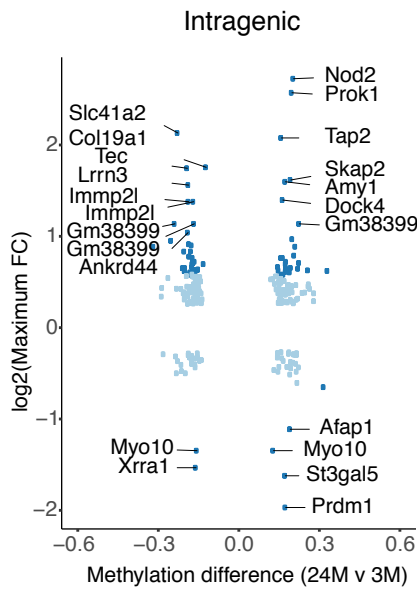**C**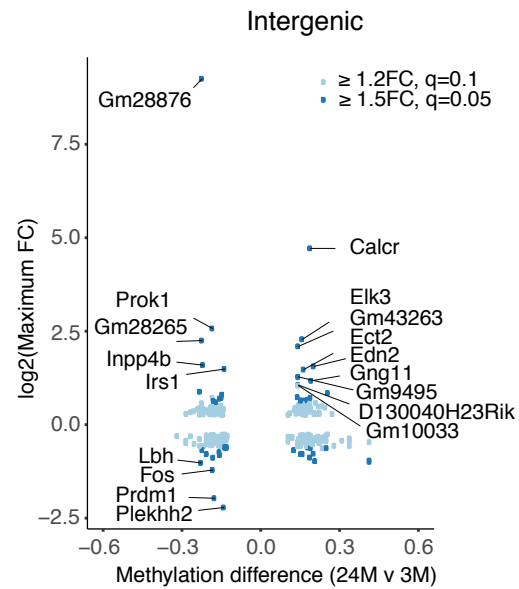**D**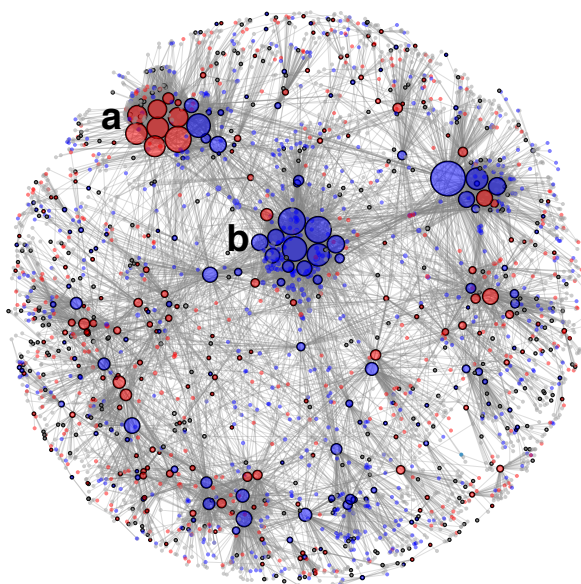

3958 proteins  
622 DMRs  
DMR:protein ratio = 0.08

- Gene with DMR
- Gene downregulated (FC > 1.2; FDR < 0.1)
- Gene upregulated (FC > 1.2; FDR < 0.1)

Proteostasis

**a**

Protein catabolism

Park2  
Cul3  
Fbxo11  
Ufl1  
Trim36  
Uba6

**b**

Protein synthesis

Rps29  
Mrps7  
Rps5  
Rpl32  
Rpl36a  
Rpl8  
Eif3g  
Rps26

**Figure S5. Patterns of DMR progression. Related to figures 4 and 5.** A) Different patterns of DNA methylation changes were identified by unsupervised clustering (taking the negative squared distances of z-score values for each DMR). EU = early up; ED = early down; PU = progressive up; PD = progressive down; LU = late up; LD = late down; O = other patterns. B,C) Plot of differential methylation against gene expression fold change for B) intragenic and C) intergenic DMRs. Names of genes with top 10%-fold-changes are shown. Light blue = Absolute Fold-change (FC)  $\geq 1.2$ ,  $q$ -value  $\leq 0.1$ ; Dark blue = Absolute FC  $\geq 1.5$ ,  $q$ -value  $\leq 0.05$ . D) First-degree protein-protein interaction network generated with 317 genes containing age-related DMRs and displaying differential gene expression. Only expressed genes were used. The network contains 3958 proteins, out of which, 622 are encoded by genes associated with DMRs. The DMR:protein ratio for the whole network is 0.08. The node size represents the number of interacting partners a protein has (see table S6 for information on the network node and edge list). Blue and red represent downregulated and upregulated genes respectively. Grey represents genes that do not change in expression. Genes with black borders have differential methylation. Note two main hubs in the network, “a” and “b”, associated with upregulation of protein degradation and downregulation of protein synthesis pathways, respectively. The names of proteins in hubs “a” and “b” are shown.

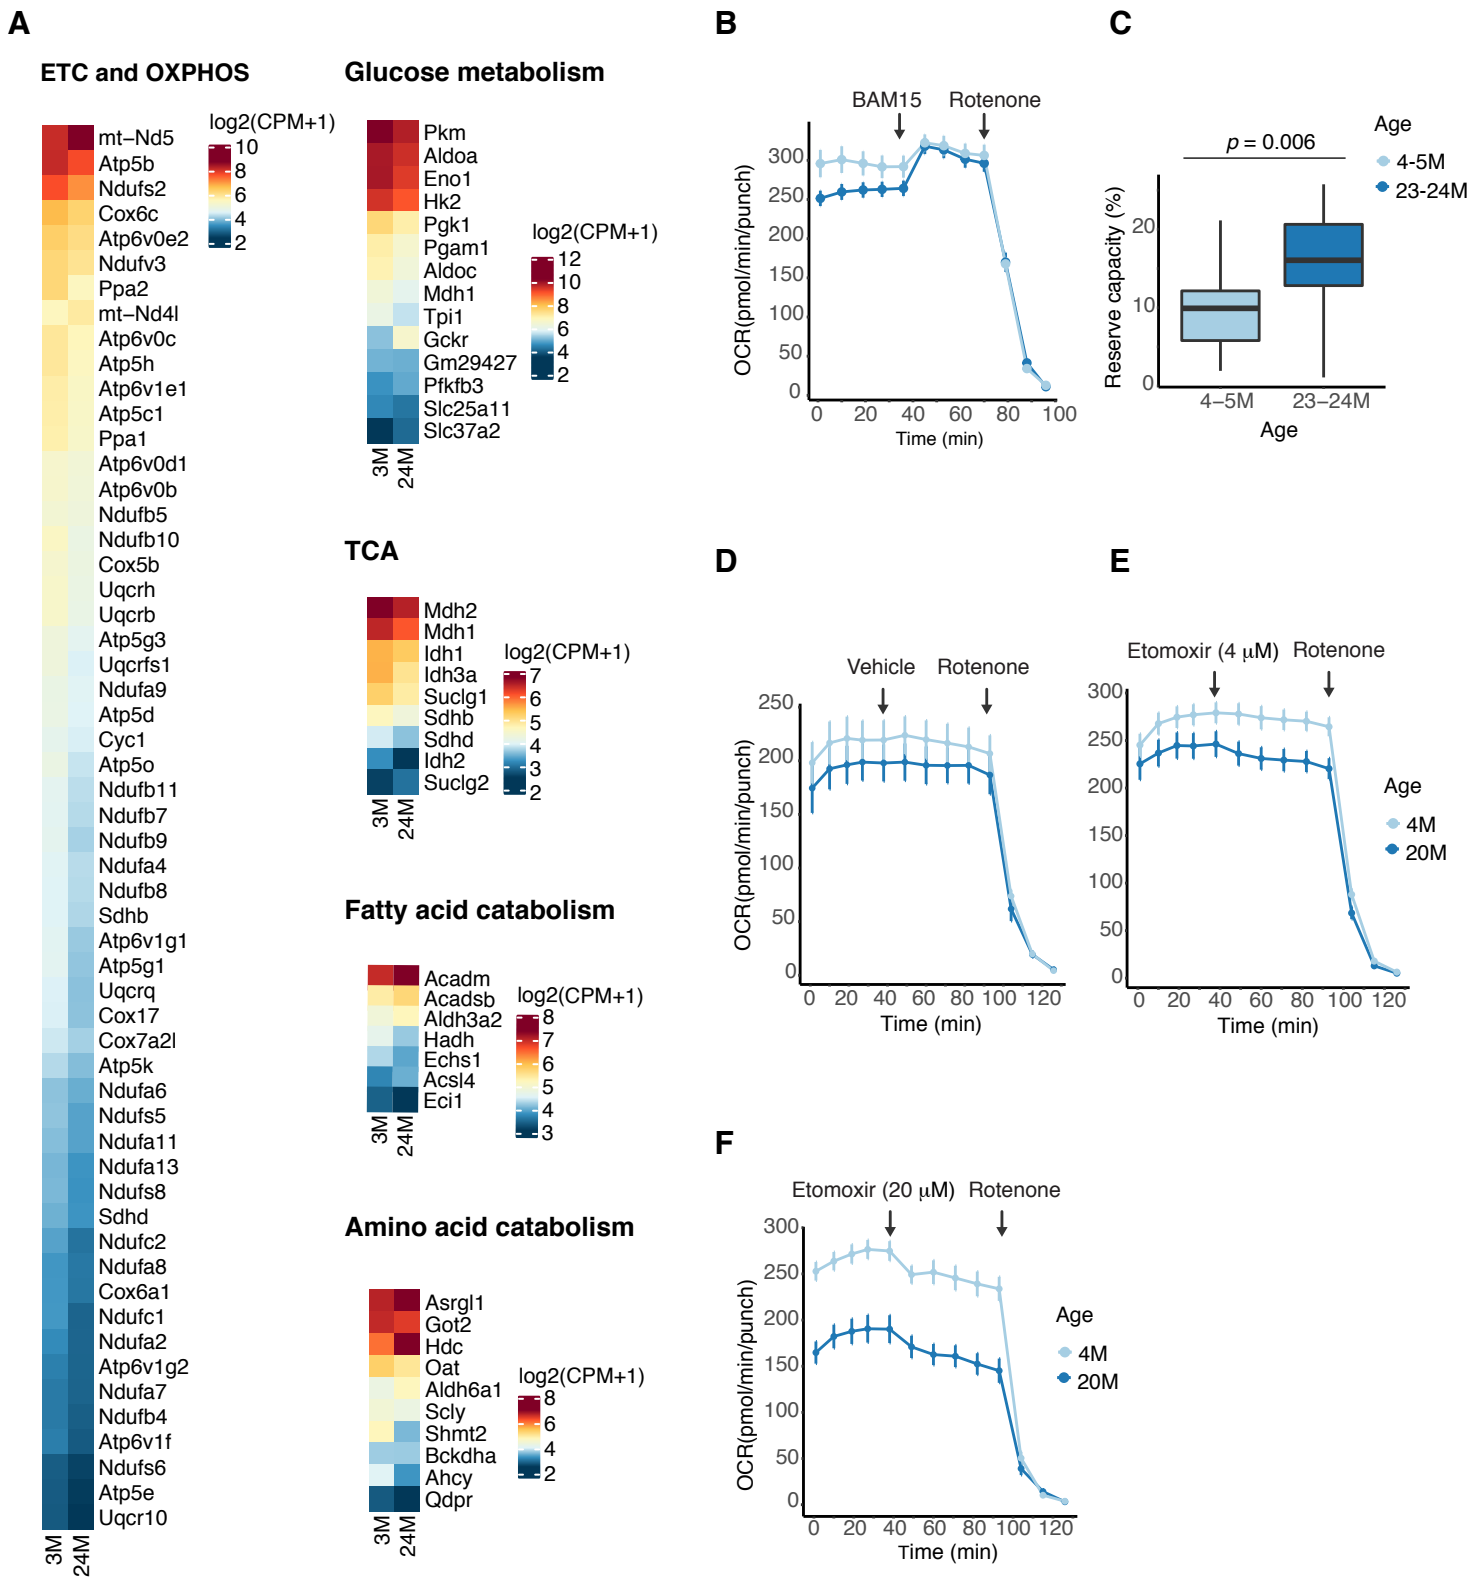

**Figure S6. Alterations in energy metabolism with age. Related to figures 5 and 6. A)** Heatmap of CPM (counts per million) transcript levels of genes involved in electron transport chain (ETC) and oxidative phosphorylation (OXPHOS), glycolysis, tricarboxylic acid (TCA) cycle, fatty acid catabolism, and amino acid catabolism. Absolute FC  $\geq 1.2$ ; FDR  $\leq 0.1$ . **B)** OCR traces from young (4-5M) and old (23-24M) C57BL/6 wild-type mouse retinas. Arrows indicate the injection of a mitochondrial uncoupler (BAM15) or complex 1 inhibitor (rotenone) in the sample well. **C)** A lower basal respiration and a larger mitochondrial reserve capacity can be observed in older mice as defined by  $100 \times (\text{maximal respiration} - \text{Basal respiration}) / \text{Maximal respiration}$ . Error bars,  $\pm$  SEM. The mitochondrial reserve capacity in 4-5M vs 23-24M retina was compared by unpaired, two-sided t-test. **D-F)** OCR traces from young (4M) and old (20M) Nrlp-EGFP mouse retinas after addition of **D)** Vehicle (Ames buffer alone) or **E)** Etomoxir at  $4 \mu\text{M}$  or **F)**  $20 \mu\text{M}$ . Arrows indicate the injection of Etomoxir or rotenone in the sample well. OCR = oxygen consumption rate; BAM15 = (2-fluorophenyl)(6-[(2-fluorophenyl)amino](1,2,5-oxadiazolo[3,4-e]pyrazin-5-yl))amine.
